# Supplementary material for: A study on thermal behaviour of thermal barrier coating: investigation of particle size, YSZ/polysilazane, time and temperature curing effect
Source: Royal Society of Chemistry journal article supplement (doi:10.1039/d4ra03620d), 2024-01-01
Supplement: d4ra03620d1.pdf [file d4ra03620d1.pdf]

## Supplementary Materials

### **A Study on Thermal Behaviour of Thermal Barrier Coating: Investigation of Particle Size, YSZ/Polysilazane, Time and Temperature Curing Effect**

Widyastuti\*<sup>a</sup>, Liyana Labiba Zulfa<sup>b</sup>, Wafiq Azhar Rizaldi<sup>a</sup>, Jauhari Azhar<sup>a</sup>, Ninik Safrida<sup>a</sup>, Azzah Dyah Pratama<sup>a</sup>, Ruri Agung Wahyuono<sup>c</sup>, Sulistijono<sup>a</sup>, Rindang Fajarin<sup>a</sup>, Arif Nur Hakim<sup>c</sup>

<sup>a</sup> *Department of Materials and Metallurgical Engineering, Faculty of Industrial Technology and Systems Engineering, Institut Teknologi Sepuluh Nopember, Jl. Arif Rahman Hakim, Kampus ITS Keputih-Sukolilo, Surabaya 60111, Indonesia, e-mail:wiwid@mat-eng.its.ac.id*

<sup>b</sup> *Department of Chemistry, Faculty of Science and Data Analytics, Institut Teknologi Sepuluh Nopember, Jl. Arif Rahman Hakim, Kampus ITS Keputih-Sukolilo, Surabaya 60111, Indonesia*

<sup>c</sup> *National Research and Innovation Agency, Tangerang 15314, Indonesia*

<sup>d</sup> *Department of Engineering Physics, Faculty of Industrial Technology and Systems Engineering, Institut Teknologi Sepuluh Nopember, Jl. Arif Rahman Hakim, Kampus ITS Keputih-Sukolilo, Surabaya 60111, Indonesia*

\* Corresponding Author. E-mail: wiwid@mat-eng.its.ac.id;

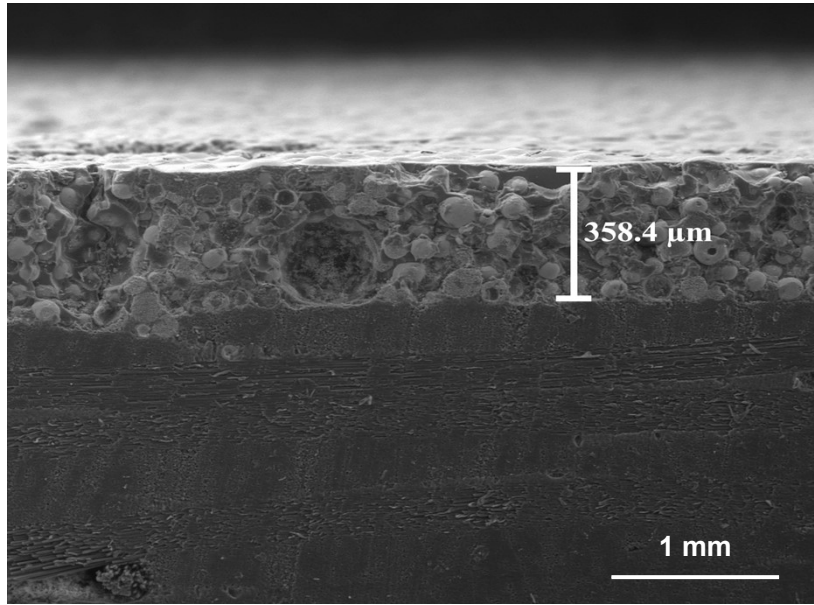

**Figure S1.** Micro cross-section of SB140/70

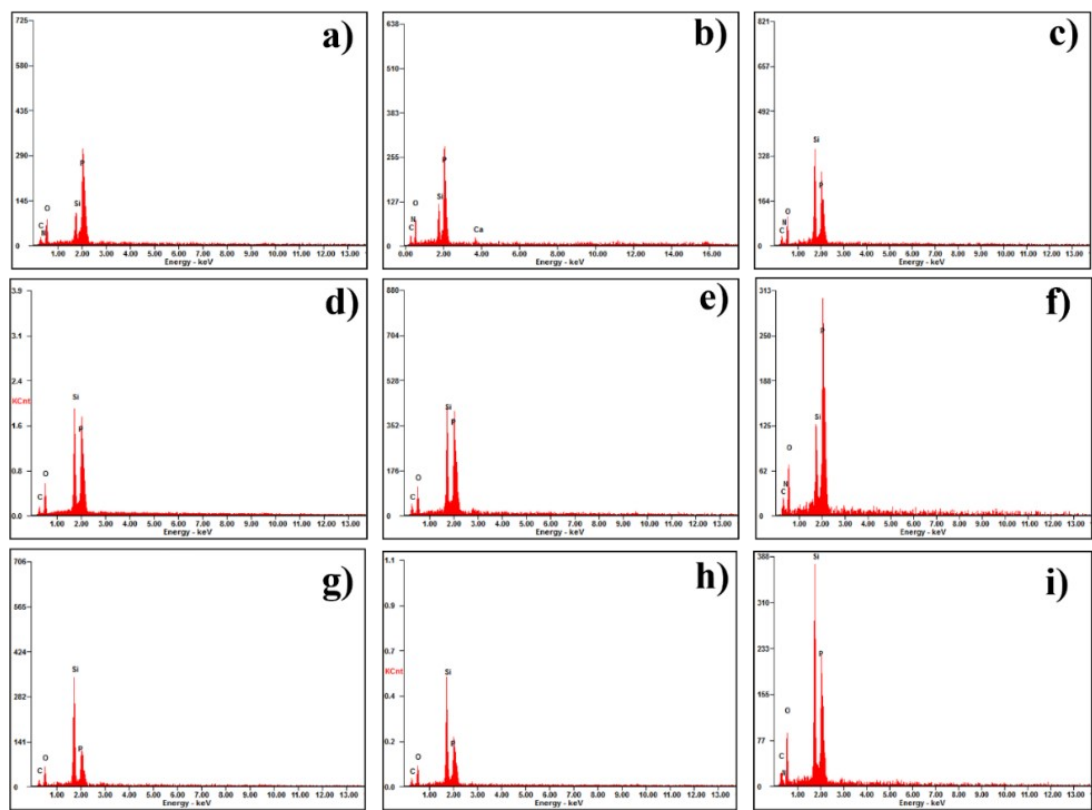

**Figure S2.** Elemental distribution of specimen (a) SB140/70, (b) SB140/60, (c) SB140/50, (d) SB200/70, (e) SB200/60, (f) SB200/50, (g) SB270/70, (h) SB270/60, and (i) SB270/50

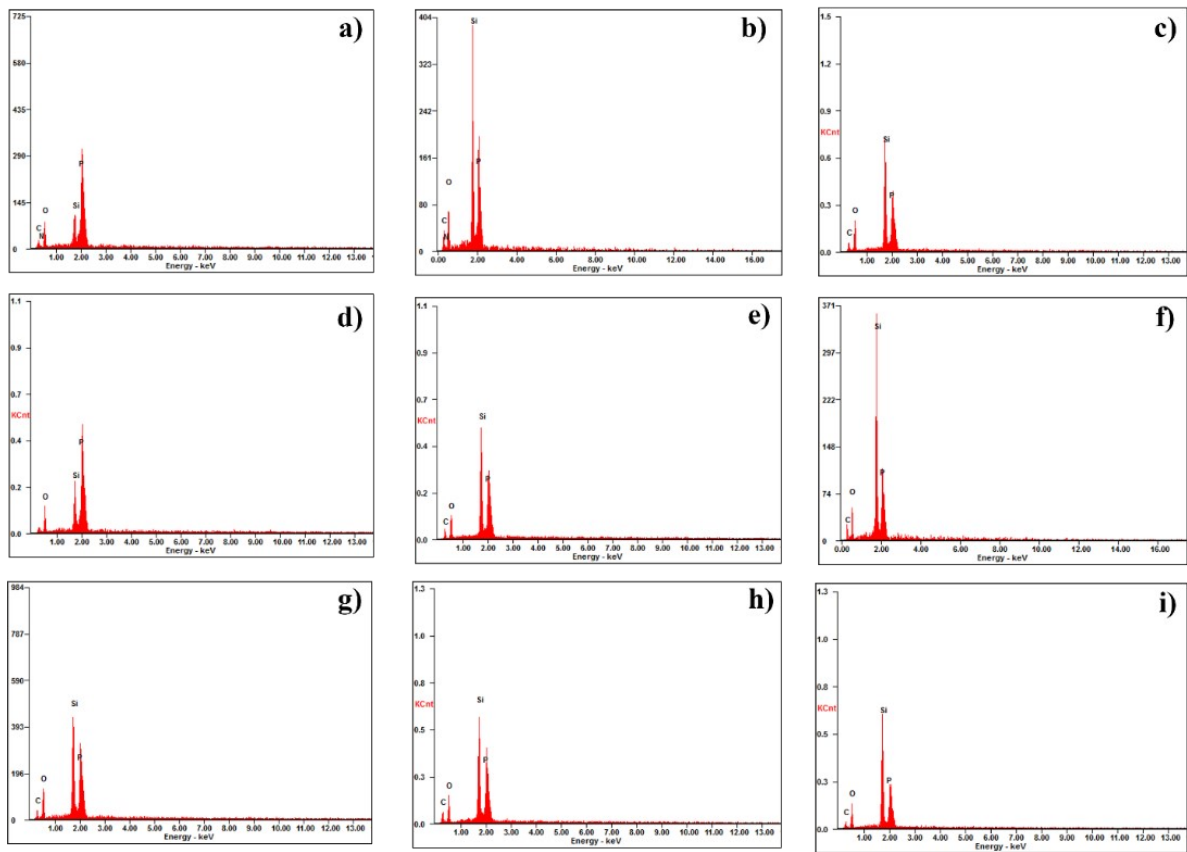

**Figure S3.** Elemental distribution of specimen (a)TB60/130, (b)TB60/160, (c)TB60/190, (d) TB120/130, (e)TB120/160, (f)TB120/190, (g) TB180/130, (h)TB180/160, and (i)TB180/190

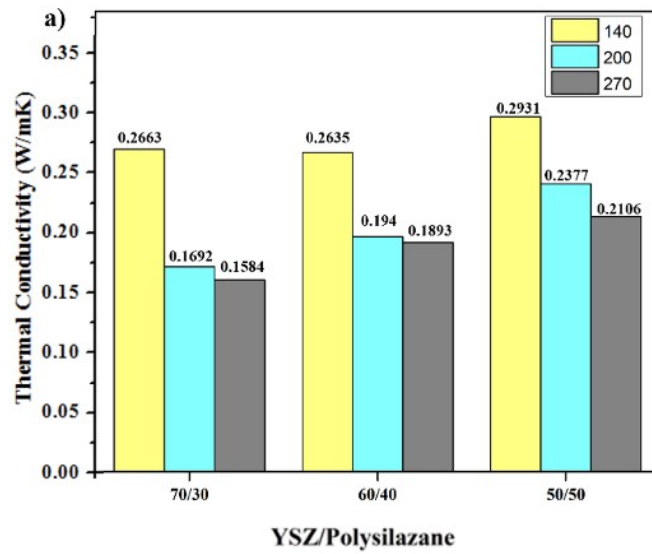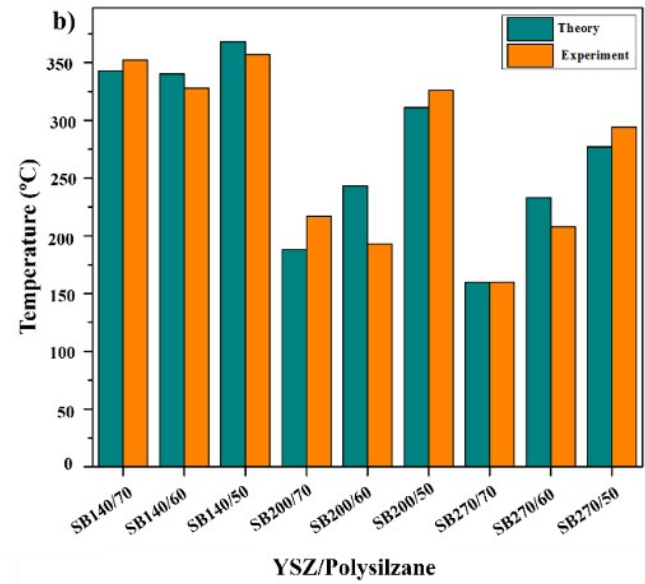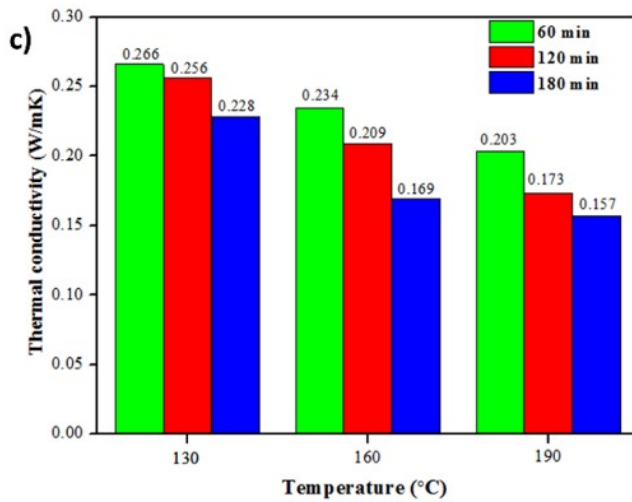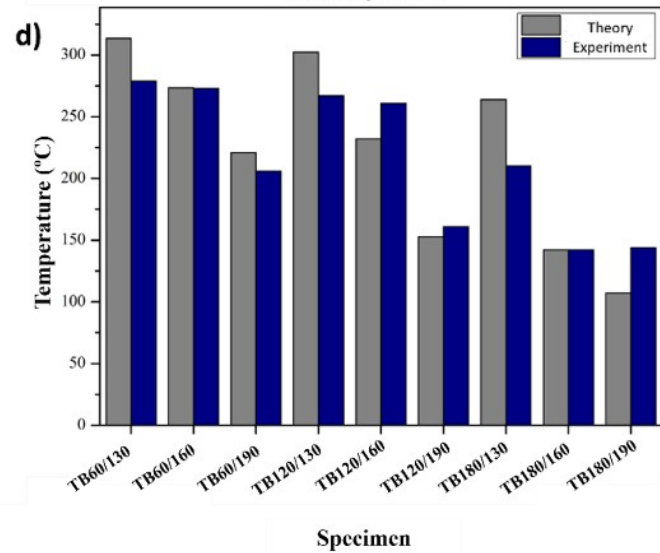

**Figure S4.** Thermal conductivity of (a) particle size and YSZ/polysilazane variations (c) time and temperature curing and Comparison of the final temperature based on theoreticals and experiments of (b) particle size and YSZ/polysilazane variations (d) time and temperature curing
